# Supplementary material for: Adamantane-Monoterpenoid Conjugates Linked via Heterocyclic Linkers Enhance the Cytotoxic Effect of Topotecan
Source: MDPI journal article supplement (doi:10.3390/molecules27113374), 2022-05-24
Supplement: s1 [file s1]

# Adamantane-monoterpenoid conjugates linked via heterocyclic linkers enhance cytotoxic effect of topotecan

Aldar A. Munkuev<sup>1</sup>, Nadezhda S. Dyrkheeva<sup>2</sup>, Tatyana E. Kornienko,<sup>2</sup> Ekaterina S. Ilina<sup>2</sup>, Dmitry I. Ivankin<sup>1</sup>, Evgeniy V. Suslov<sup>1</sup>, Dina V. Korchagina<sup>1</sup>, Yuriy V. Gatilov<sup>1</sup>, Alexandra L. Zakharenko<sup>2</sup>, Anastasia A. Malakhova<sup>2,4</sup>, Jóhannes Reynisson<sup>3</sup>, Konstantin P. Volcho<sup>1\*</sup>, Nariman F. Salakhutdinov<sup>1\*</sup>, Olga I. Lavrik<sup>2,5</sup>

<sup>1</sup> N. N. Vorozhtsov Novosibirsk Institute of Organic Chemistry, Siberian Branch of the Russian Academy of Sciences, 9, Akademika Lavrentieva Ave., 630090 Novosibirsk, Russia; amunkuev@nioch.nsc.ru (A.A.M.); ivankind@nioch.nsc.ru (D.I.I.); suslov@nioch.nsc.ru (E.V.S.); korchaga@nioch.nsc.ru (D.V.K.); gatilov@nioch.nsc.ru (Y.V.G.); volcho@nioch.nsc.ru (K.P.V.); anvar@nioch.nsc.ru (N.F.S.)

<sup>2</sup> Institute of Chemical Biology and Fundamental Medicine, Siberian Branch of the Russian Academy of Sciences, Novosibirsk 630090, Russian Federation; dyrkheeva.n.s@gmail.com (N.S.D.); t.kornienko1995@gmail.com (T.E.K.); sashaz@nioch.nsc.ru (A.L.Z.); katya.plekhanova@gmail.com (E.S.I.); lavrik@nioch.nsc.ru (O.I.L.)

<sup>3</sup> School of Pharmacy and Bioengineering, Keele University, Hornbeam Building, Staffordshire ST5 5BG, UK; j.reynisson@keele.ac.uk

<sup>4</sup> Federal Research Centre Institute of Cytology and Genetics, Siberian Branch of the Russian Academy of Sciences, 630090 Novosibirsk, Russia

<sup>5</sup> Department of Physical and Chemical Biology and Biotechnology, Altai State University, Pr. Lenina 61, 656049 Barnaul, Russia

\* Correspondence: volcho@nioch.nsc.ru; anvar@nioch.nsc.ru

## Supplementary materials

### Table of contents

|                                                                                                                                         |                       |
|-----------------------------------------------------------------------------------------------------------------------------------------|-----------------------|
| Crystal structure for compounds <b>4</b> and <b>15b</b>                                                                                 | <b>Figure S1</b>      |
| The combination index (CI) values for different concentrations of topotecan and Tdp1 inhibitors                                         | <b>Table S1</b>       |
| The cytotoxicity of the monoterpene derivatives against HeLa and HEK293A cells                                                          | <b>Figure S2</b>      |
| The influence of the TDP1 inhibitors on topotecan cytotoxicity derivatives against HeLa and HEK293A cells                               | <b>Figure S3</b>      |
| The influence of topotecan on the adamantane-monoterpenoid derivatives' cytotoxicity                                                    | <b>Figure S4</b>      |
| The binding affinities as predicted by the scoring functions used to the catalytic Tdp1 binding pocket                                  | <b>Table S2</b>       |
| The molecular descriptors and their corresponding Known Drug Indexes 2a and 2b (KDI <sub>2a/2b</sub> )                                  | <b>Table S3</b>       |
| Definition of lead-like, drug-like and Known Drug Space (KDS) in terms of molecular descriptors                                         | <b>Table S4</b>       |
| <sup>1</sup> H, <sup>13</sup> C NMR, DFS and IR spectra of compounds <b>8</b> , <b>14a-14b</b> , <b>15a-b</b> , <b>16</b> and <b>17</b> | <b>Figures S5-S29</b> |

Chemical structures of the molecules **4** and **15b** obtained by X-ray single crystal diffractometry:

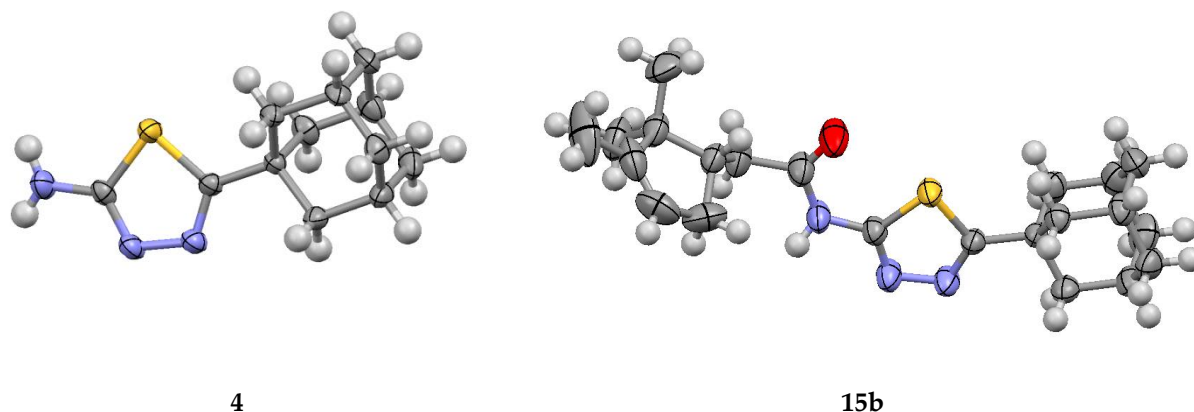

**Figure S1.** Crystal structure for compounds **4** and **15b** (50% probability ellipsoids)

Crystal data **4**:  $C_{12}H_{17}N_3S$ ,  $M = 235.34$ , triclinic, space group  $P-1$ , at 296 K:  $a = 7.1274(3)$ ,  $b = 11.6764(6)$ ,  $c = 14.5849(7)$  Å,  $\alpha = 98.754(2)$ ,  $\beta = 100.214(2)$ ,  $\gamma = 97.009(2)^\circ$ ,  $V = 1166.70(10)$  Å<sup>3</sup>,  $Z = 4$ ,  $d_{\text{calc}} = 1.340$  g·cm<sup>-3</sup>,  $\mu = 0.254$  mm<sup>-1</sup>, a total of 37381 ( $\theta_{\text{max}} = 29.16^\circ$ ), 6287 unique ( $R_{\text{int}} = 0.0363$ ), 4869 [ $I > 2\sigma(I)$ ], 305 parameters. GooF = 0.983,  $R_1 = 0.0364$ ,  $wR_2 = 0.0962$  [ $I > 2\sigma(I)$ ],  $R_1 = 0.0532$ ,  $wR_2 = 0.1096$  (all data), max/min diff. peak 0.33/-0.28 e·Å<sup>-3</sup>.

Crystal data **15b**:  $C_{22}H_{31}N_3OS$ ,  $M = 385.56$ , monoclinic, space group  $P2_1$ , at 296 K:  $a = 7.1954(9)$ ,  $b = 22.193(3)$ ,  $c = 13.9687(19)$  Å,  $\beta = 104.282(5)^\circ$ ,  $V = 2161.7(5)$  Å<sup>3</sup>,  $Z = 4$ ,  $d_{\text{calc}} = 1.185$  g·cm<sup>-3</sup>,  $\mu = 0.166$  mm<sup>-1</sup>, a total of 43798 ( $\theta_{\text{max}} = 27.25^\circ$ ), 9632 unique ( $R_{\text{int}} = 0.0459$ ), 8032 [ $I > 2\sigma(I)$ ], 486 parameters. GooF = 1.044,  $R_1 = 0.0525$ ,  $wR_2 = 0.1489$  [ $I > 2\sigma(I)$ ],  $R_1 = 0.0686$ ,  $wR_2 = 0.1733$  (all data), max/min diff. peak 0.43/-0.26 e·Å<sup>-3</sup>.

**Table S1.** The combination index (CI) values for different concentrations of topotecan and Tdp1 inhibitors.

CI Data for Non-Constant Combo: (Tpc+20  $\mu\text{M}$  **14a**)

| Dose Tpc, $\mu\text{M}$ | Dose <b>14a</b> , $\mu\text{M}$ | Effect | CI      |
|-------------------------|---------------------------------|--------|---------|
| 0.3                     | 20.0                            | 0.17   | NaN     |
| 0.6                     | 20.0                            | 0.47   | NaN     |
| 1.2                     | 20.0                            | 0.81   | 0.28719 |
| 2.5                     | 20.0                            | 0.92   | 0.44610 |
| 5.0                     | 20.0                            | 0.96   | 0.71769 |

CI Data for Non-Constant Combo: (Tpc + 20  $\mu\text{M}$  **14b**)

| Dose Tpc, $\mu\text{M}$ | Dose <b>14b</b> , $\mu\text{M}$ | Effect | CI      |
|-------------------------|---------------------------------|--------|---------|
| 0.3                     | 20.0                            | 0.94   | 0.00419 |
| 0.5                     | 20.0                            | 0.97   | 0.00165 |
| 1.0                     | 20.0                            | 0.98   | 0.00117 |
| 2.0                     | 20.0                            | 0.98   | 0.00166 |
| 4.0                     | 20.0                            | 0.99   | 0.00113 |

CI Data for Non-Constant Combo: (Tpc + 50  $\mu$ M **15a**)

| Dose Tpc, $\mu$ M | Dose 15a, $\mu$ M | Effect | CI      |
|-------------------|-------------------|--------|---------|
| 0.3               | 50.0              | 0.27   | NaN     |
| 0.5               | 50.0              | 0.53   | 0.07887 |
| 1.0               | 50.0              | 0.73   | 0.06365 |
| 2.0               | 50.0              | 0.83   | 0.06893 |
| 4.0               | 50.0              | 0.9    | 0.07307 |

CI Data for Non-Constant Combo: (Tpc + 50  $\mu$ M **15b**)

| Dose Tpc, $\mu$ M | Dose 15b, $\mu$ M | Effect | CI      |
|-------------------|-------------------|--------|---------|
| 0.3               | 50.0              | 0.48   | NaN     |
| 0.5               | 50.0              | 0.69   | 0.05563 |
| 1.0               | 50.0              | 0.84   | 0.04653 |
| 2.0               | 50.0              | 0.9    | 0.05382 |
| 4.0               | 50.0              | 0.91   | 0.09564 |

CI Data for Non-Constant Combo: (Tpc+20  $\mu$ M **16**)

| Dose Tpc, $\mu$ M | Dose 16, $\mu$ M | Effect | CI      |
|-------------------|------------------|--------|---------|
| 0.3               | 20.0             | 0.035  | NaN     |
| 0.6               | 20.0             | 0.1    | NaN     |
| 1.2               | 20.0             | 0.36   | NaN     |
| 2.5               | 20.0             | 0.75   | 0.51140 |
| 5.0               | 20.0             | 0.85   | 0.87206 |

CI Data for Non-Constant Combo: (Tpc+20  $\mu$ M **17**)

| Dose Tpc, $\mu$ M | Dose 17, $\mu$ M | Effect | CI      |
|-------------------|------------------|--------|---------|
| 0.3               | 20.0             | 1.0E-4 | NaN     |
| 0.6               | 20.0             | 0.02   | NaN     |
| 1.2               | 20.0             | 0.25   | NaN     |
| 2.5               | 20.0             | 0.6    | 0.79239 |
| 5.0               | 20.0             | 0.81   | 1.17556 |

**Figure S2.** The cytotoxicity of the monoterpene derivatives against HeLa and HEK293A cells, as measured by the EZ4U test. Error bars show standard deviations.

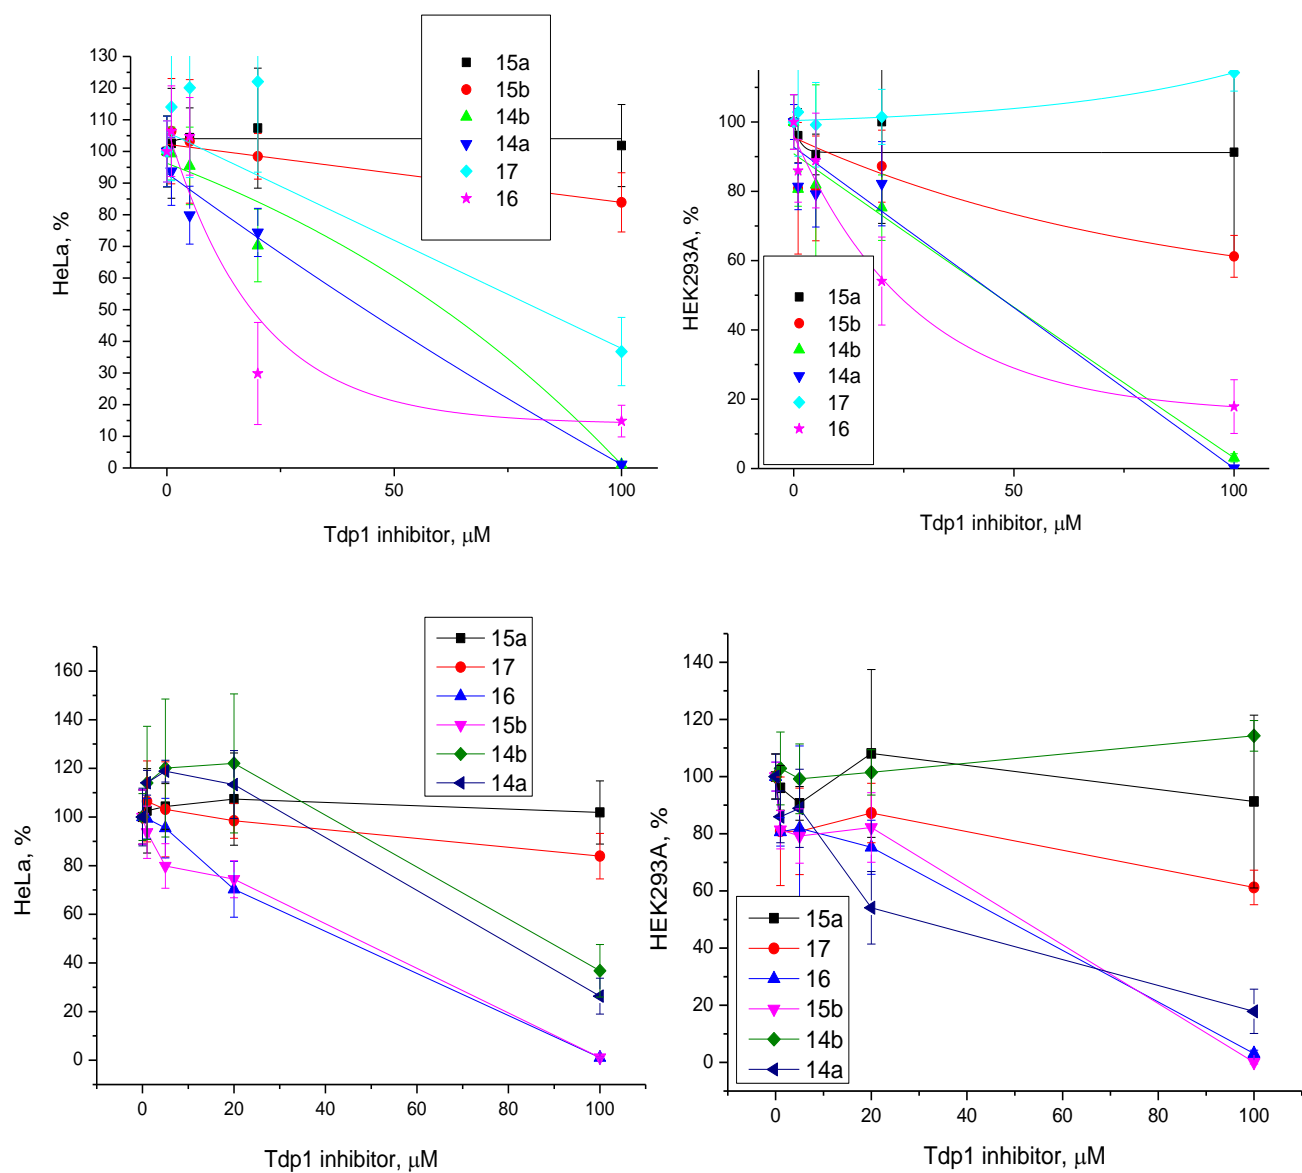

**Figure S3.** The influence of the TDP1 inhibitors on topotecan cytotoxicity derivatives against HeLa and HEK293A cells. Error bars show standard deviations.

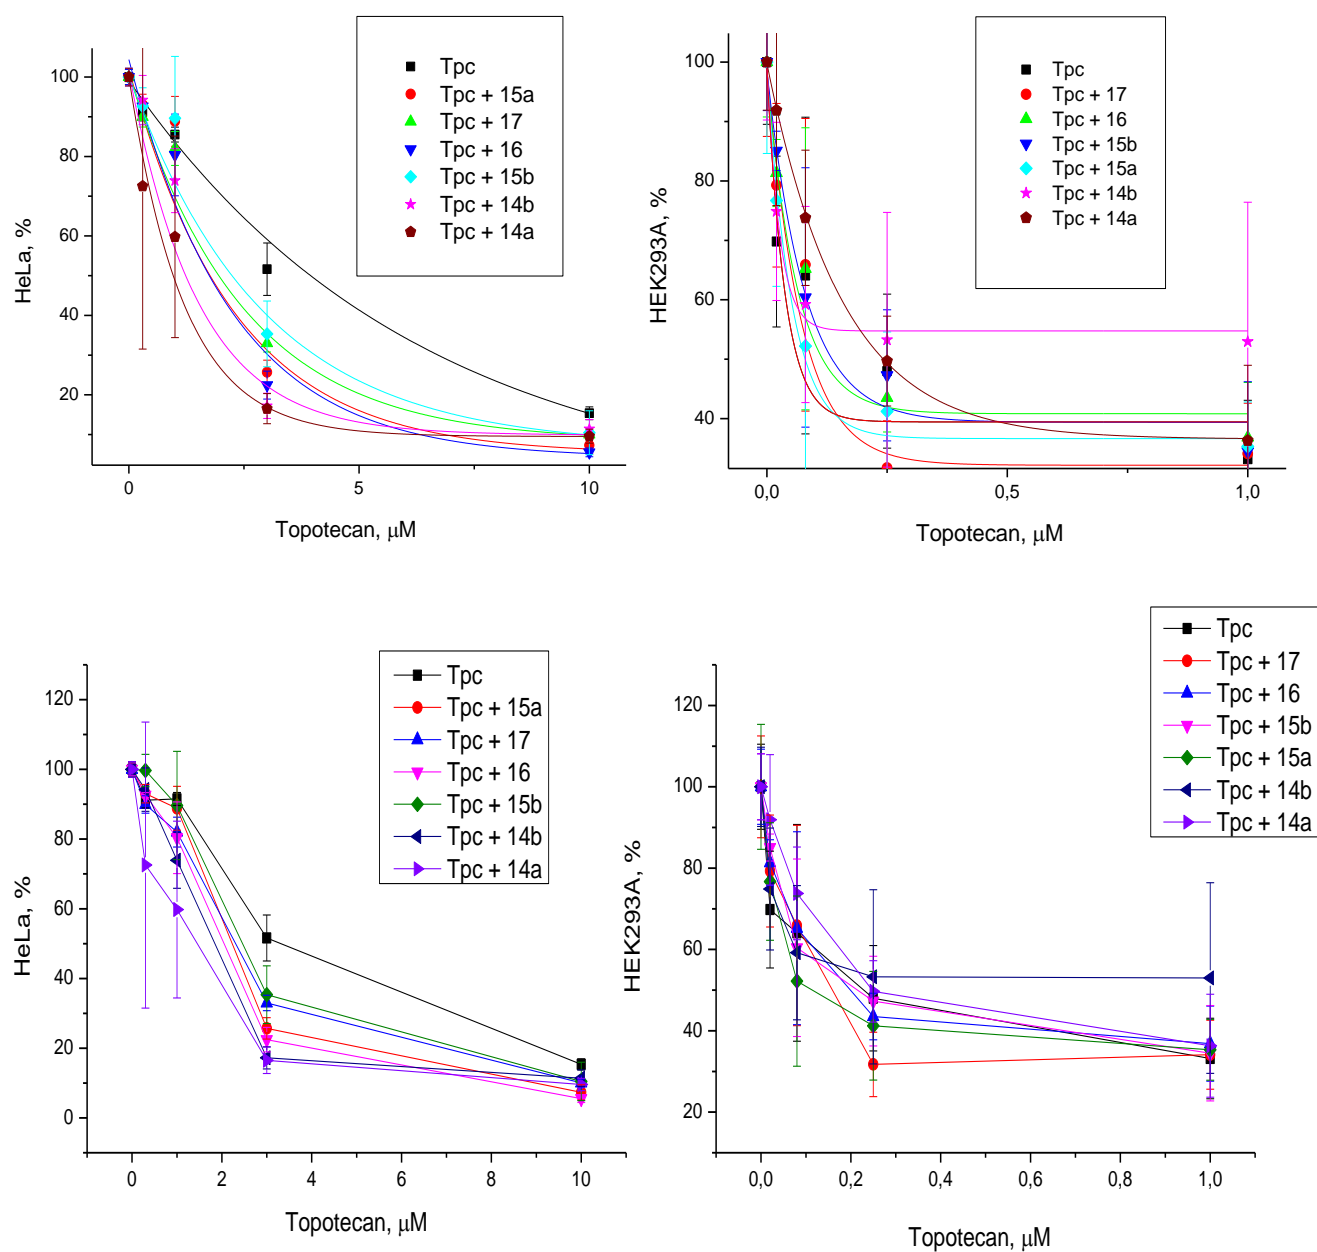

**Figure S4.** The influence of topotecan on the adamantane-monoterpenoid derivatives' cytotoxicity.

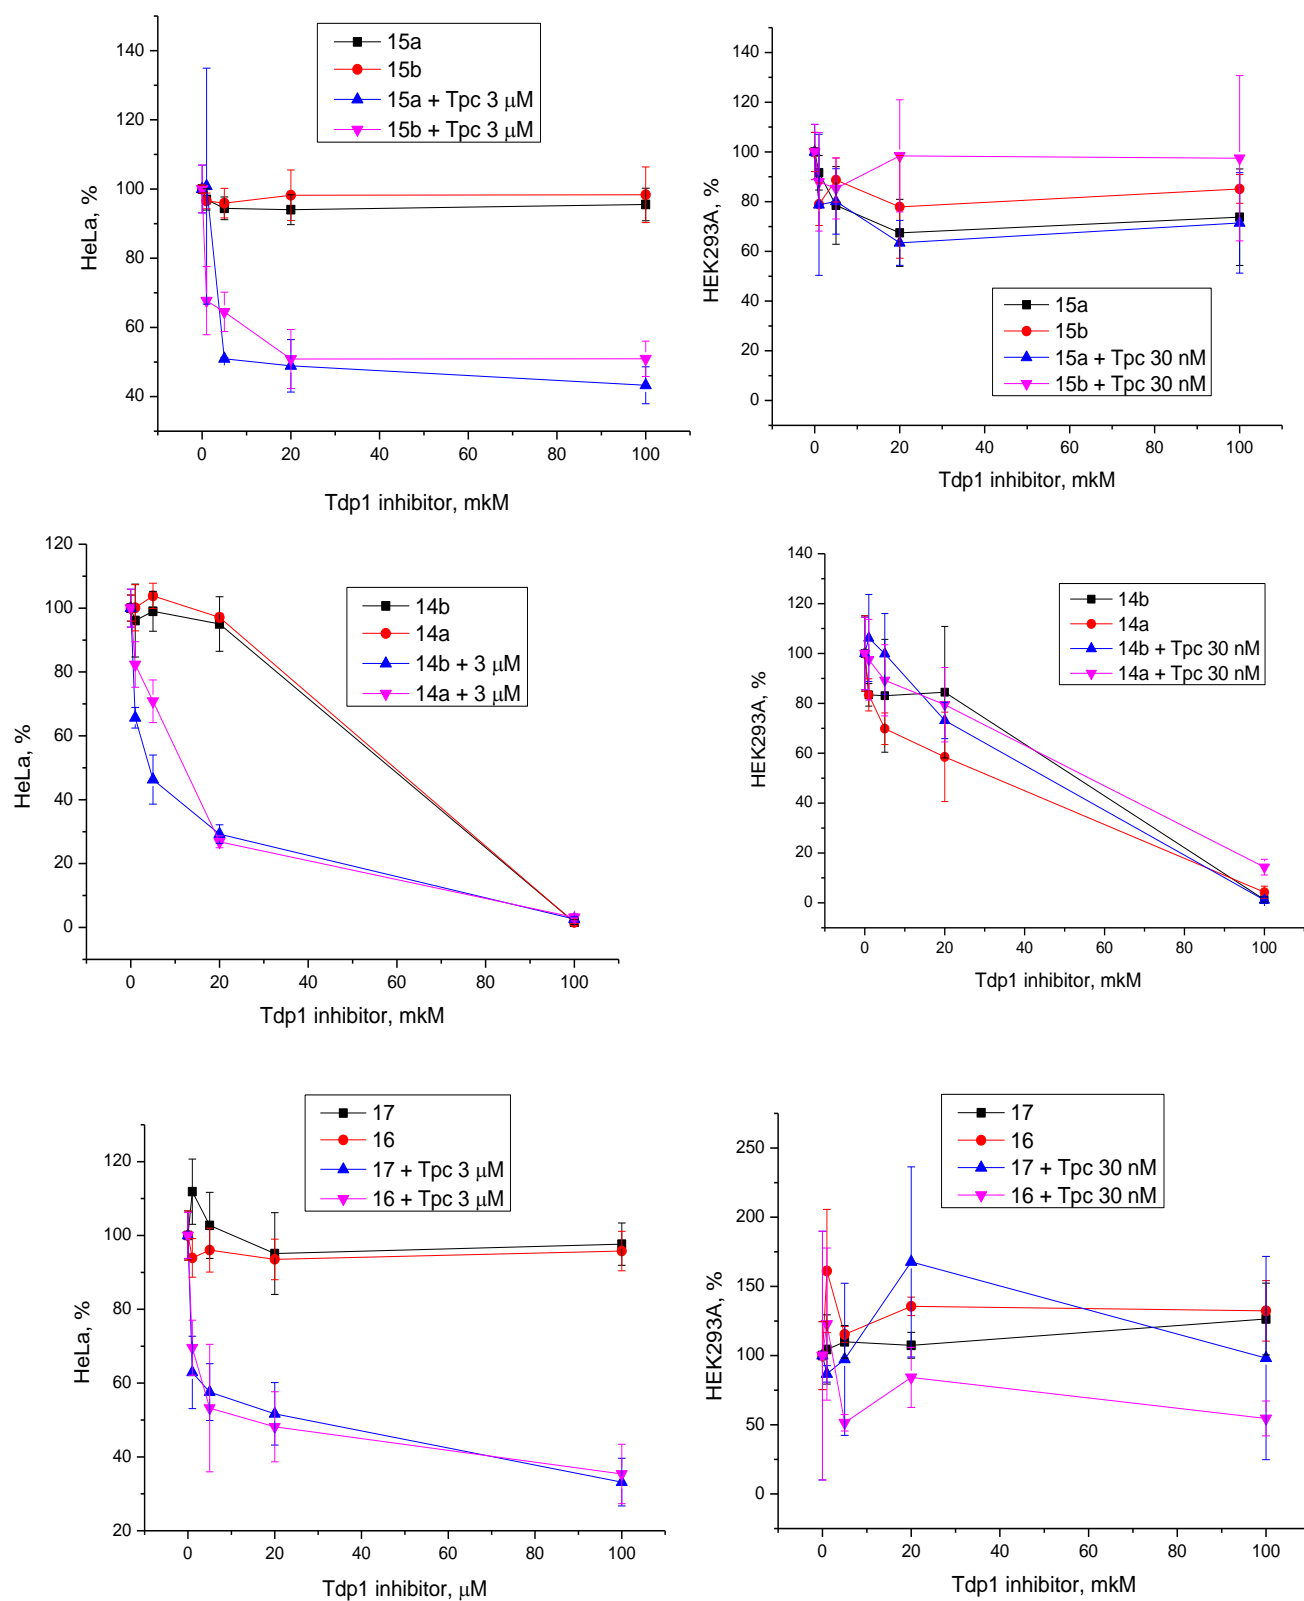

**Table S2.** The binding affinities as predicted by the scoring functions used to the catalytic Tdp1 binding pocket.

| Ligands    | ASP  | ChemPLP | CS   | GS   | IC <sub>50</sub> (μM) |
|------------|------|---------|------|------|-----------------------|
| <b>14a</b> | 30.7 | 49.9    | 24.8 | 57.7 | 5.5                   |
| <b>14b</b> | 29.3 | 53.9    | 26.3 | 57.3 | 6.1                   |
| <b>15a</b> | 30.2 | 52.2    | 24.7 | 52.9 | 6.1                   |
| <b>15b</b> | 30.2 | 51.9    | 23.2 | 53.0 | 5.6                   |
| <b>16</b>  | 31.1 | 52.2    | 25.6 | 52.3 | 34                    |
| <b>17</b>  | 29.7 | 51.2    | 24.3 | 55.9 | >30                   |

**Table S3.** The molecular descriptors and their corresponding Known Drug Indexes 2a and 2b (KDI<sub>2a/2b</sub>). The R<sup>2</sup> numbers derived from correlation with the Tdp1 IC<sub>50</sub> values; the Tdp1 IC<sub>50</sub> value of **17** is set to 30 μM.

|                            | RB       | MW       | HD       | HA       | Log P    | PSA      | KDI <sub>2A</sub> | KDI <sub>2B</sub> |
|----------------------------|----------|----------|----------|----------|----------|----------|-------------------|-------------------|
| <b>14a</b>                 | 4        | 371.6    | 1        | 2.5      | 6.1      | 42.3     | 4.53              | 0.12              |
| <b>14b</b>                 | 4        | 371.6    | 1        | 2.5      | 6.0      | 41.6     | 4.53              | 0.12              |
| <b>15a</b>                 | 3        | 385.6    | 1        | 4.5      | 5.0      | 61.0     | 5.27              | 0.43              |
| <b>15b</b>                 | 3        | 385.6    | 1        | 4.5      | 5.0      | 59.5     | 5.25              | 0.42              |
| <b>16</b>                  | 2        | 399.6    | 0        | 5.5      | 4.1      | 81.9     | 5.15              | 0.35              |
| <b>17</b>                  | 4        | 449.6    | 1        | 8.5      | 3.2      | 96.5     | 5.21              | 0.40              |
| <b>Tdp1 R<sup>2</sup>:</b> | 0.150(-) | 0.576(+) | 0.493(-) | 0.590(+) | 0.710(-) | 0.772(+) | 0.165(+)          | 0.123(+)          |

**Table S4.** Definition of lead-like, drug-like and Known Drug Space (KDS) in terms of molecular descriptors. The values given are the maxima for each descriptor for the volumes of chemical space used.

|                                            | Lead-like Space | Drug-like Space | Known Drug Space |
|--------------------------------------------|-----------------|-----------------|------------------|
| Molecular weight (g mol <sup>-1</sup> )    | 300             | 500             | 800              |
| Lipophilicity (Log P)                      | 3               | 5               | 6.5              |
| Hydrogen bond donors (HD)                  | 3               | 5               | 7                |
| Hydrogen bond acceptors (HA)               | 3               | 10              | 15               |
| Polar surface area (Å <sup>2</sup> ) (PSA) | 60              | 140             | 180              |
| Rotatable bonds (RB)                       | 3               | 10              | 17               |

# $^1\text{H}$ , $^{13}\text{C}$ NMR & DFS spectra

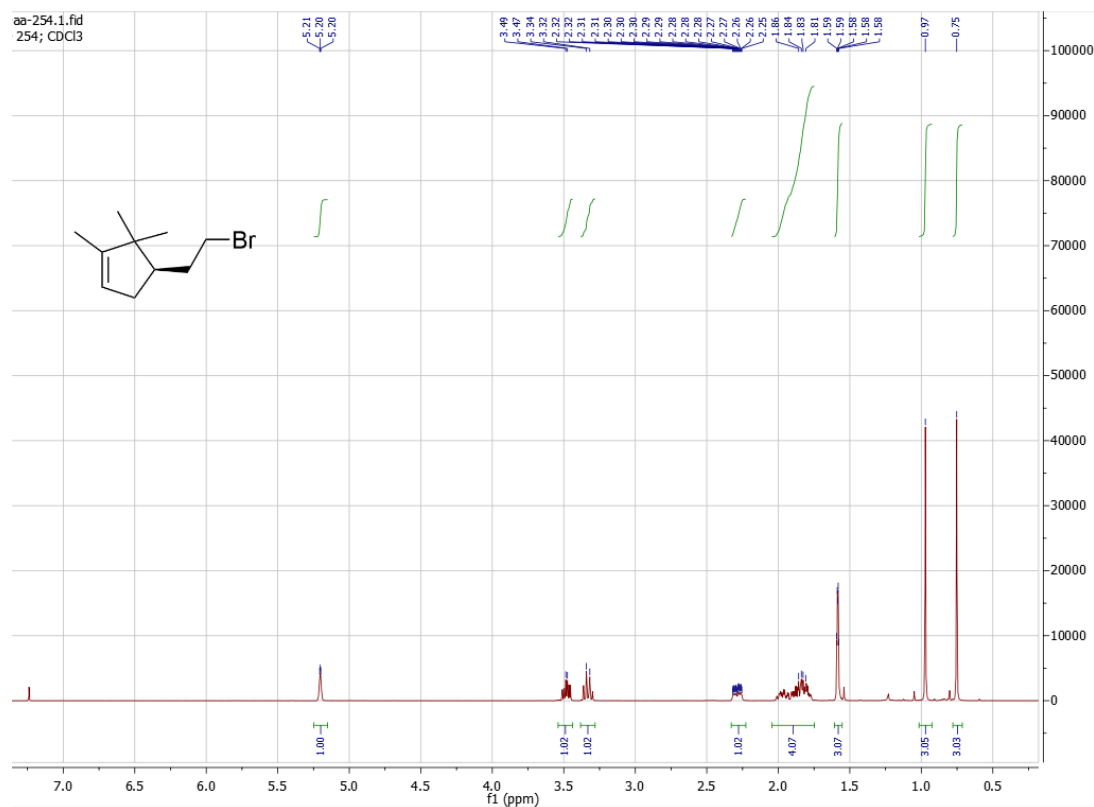

Figure S5. The  $^1\text{H}$  NMR spectrum of 8.

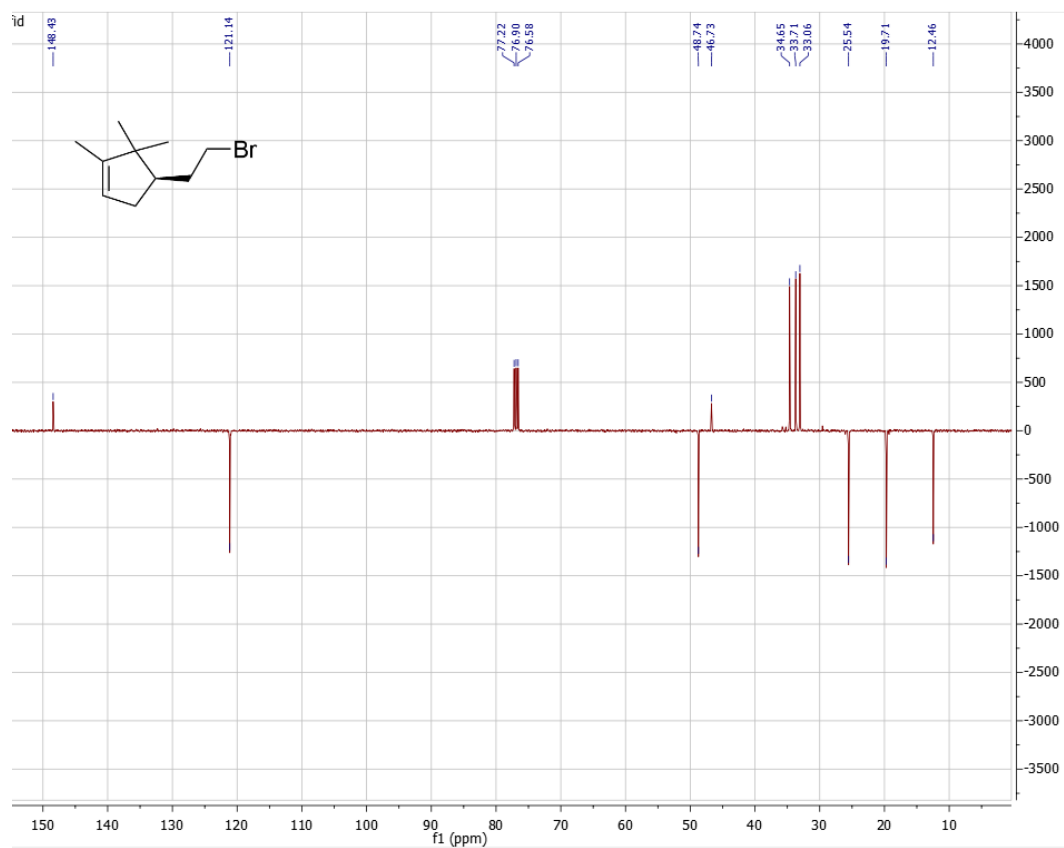

Figure S6. The  $^{13}\text{C}$  NMR spectrum of 8.



AA-254 #5 RT: 0.24 AV: 1 NL: 3.55E7  
T: + c EI Full ms [32.50-250.50]

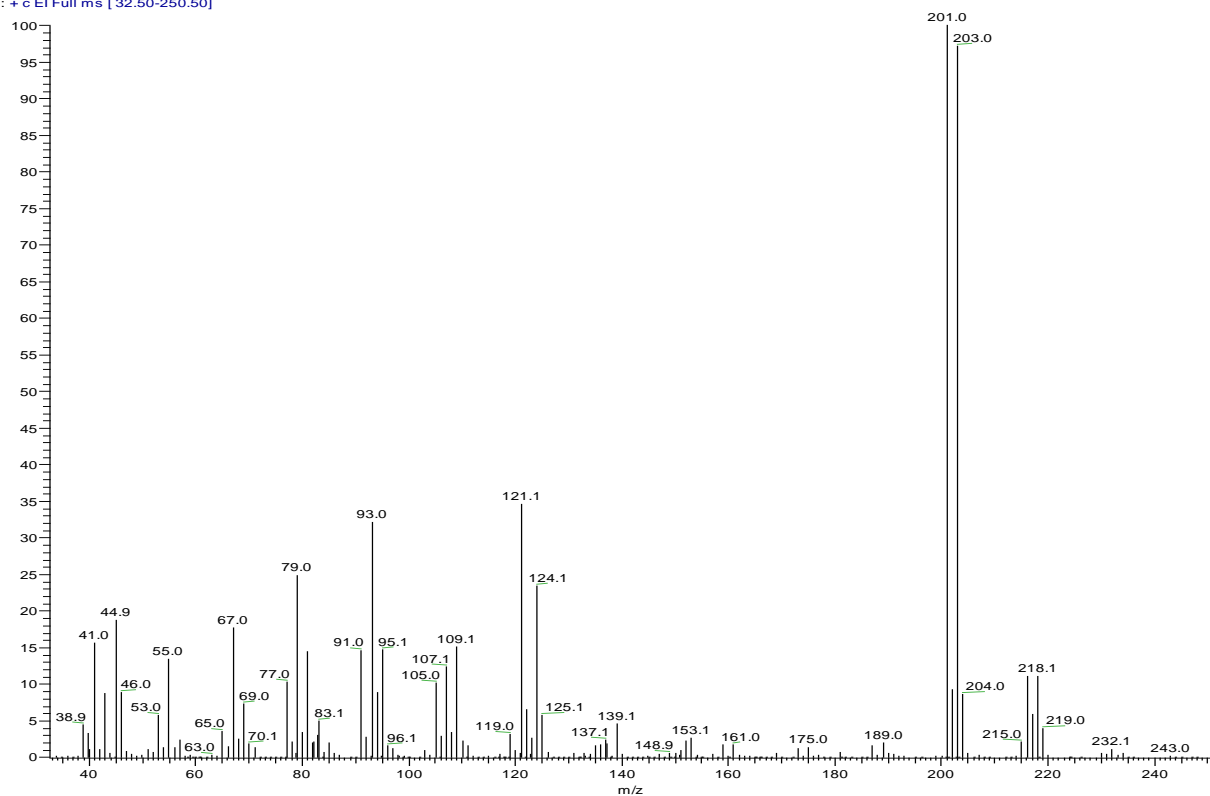

Figure S7. The DFS spectrum of 8.

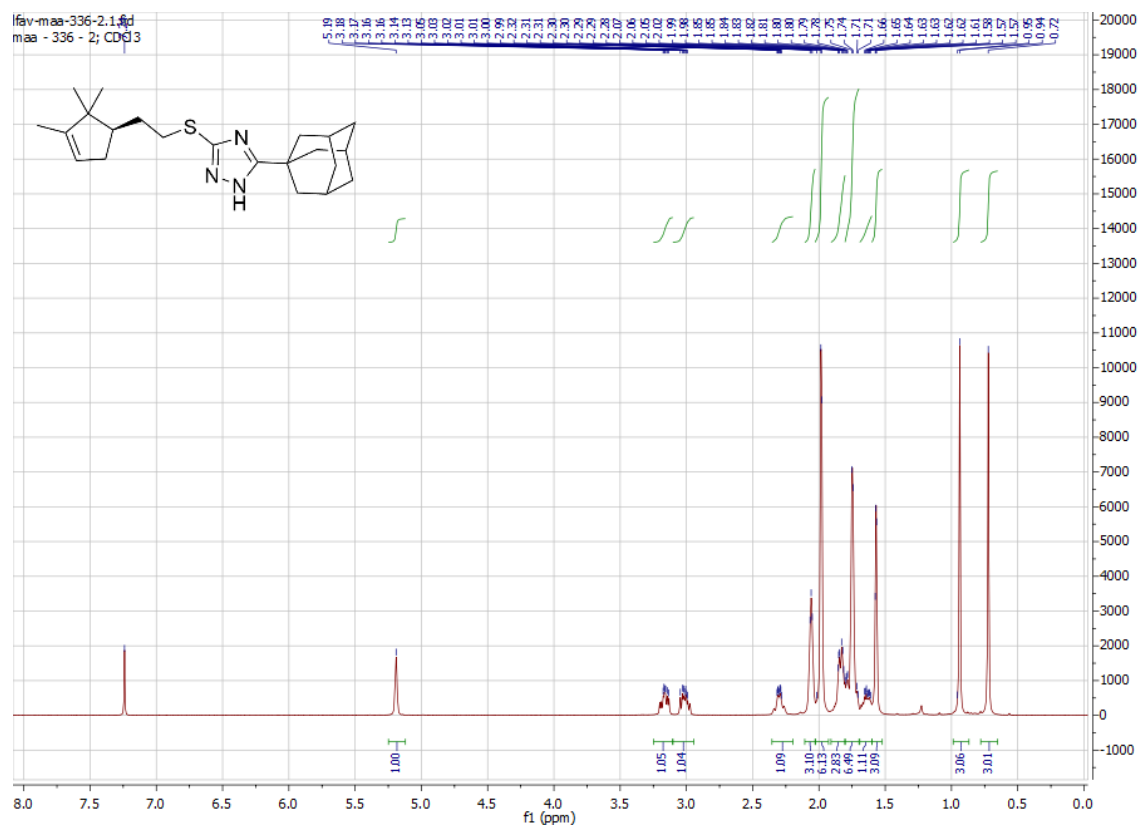

Figure S8. The  $^1\text{H}$  NMR spectrum of 14a.

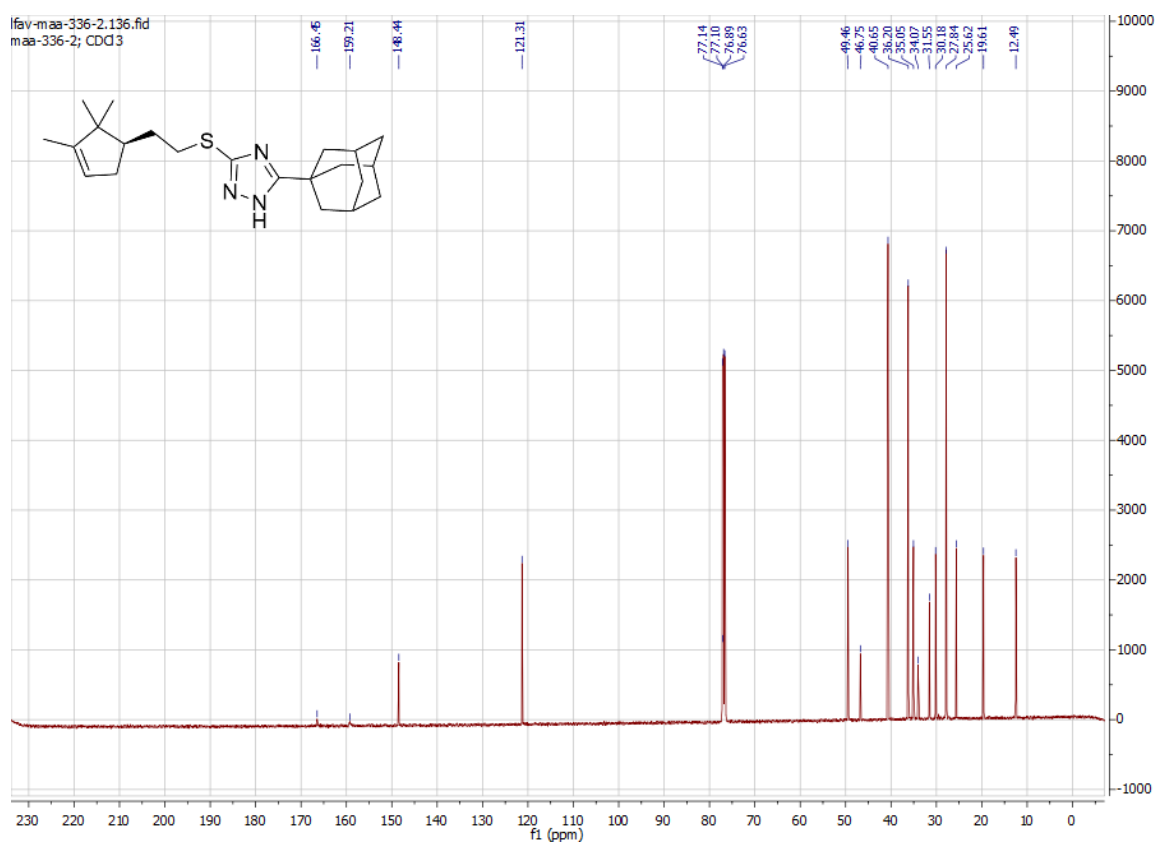

Figure S9. The <sup>13</sup>C NMR spectrum of 14a.

maa-336 #8 RT: 0.53 AV: 1 NL: 5.81E6  
T: + c EI Full ms [ 14.50-400.50]

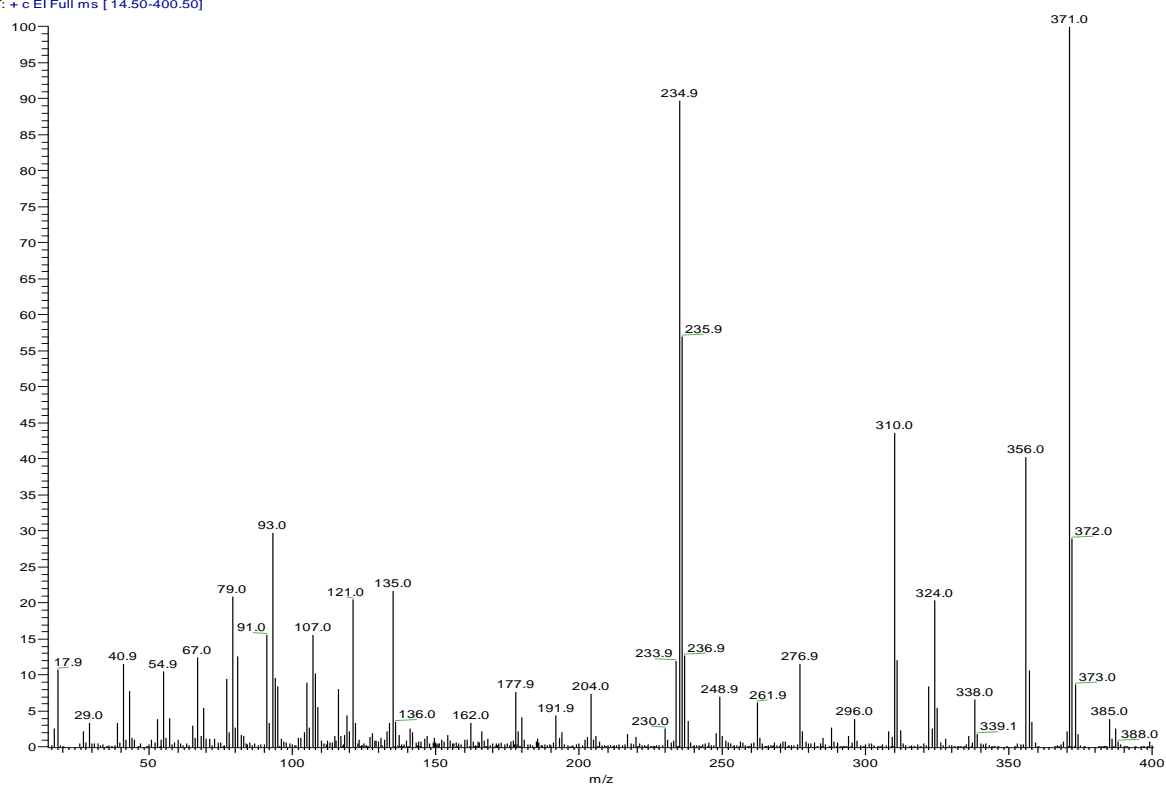

Figure S10. The DFS spectrum of 14a.

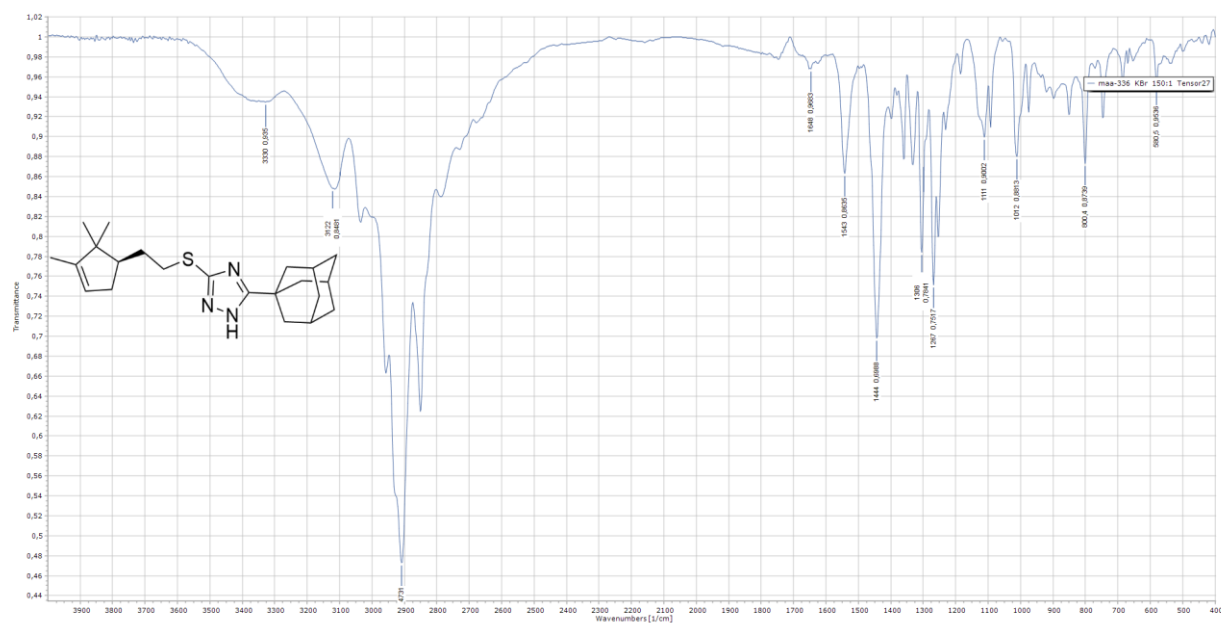

Figure S11. The IR spectrum of 14a.

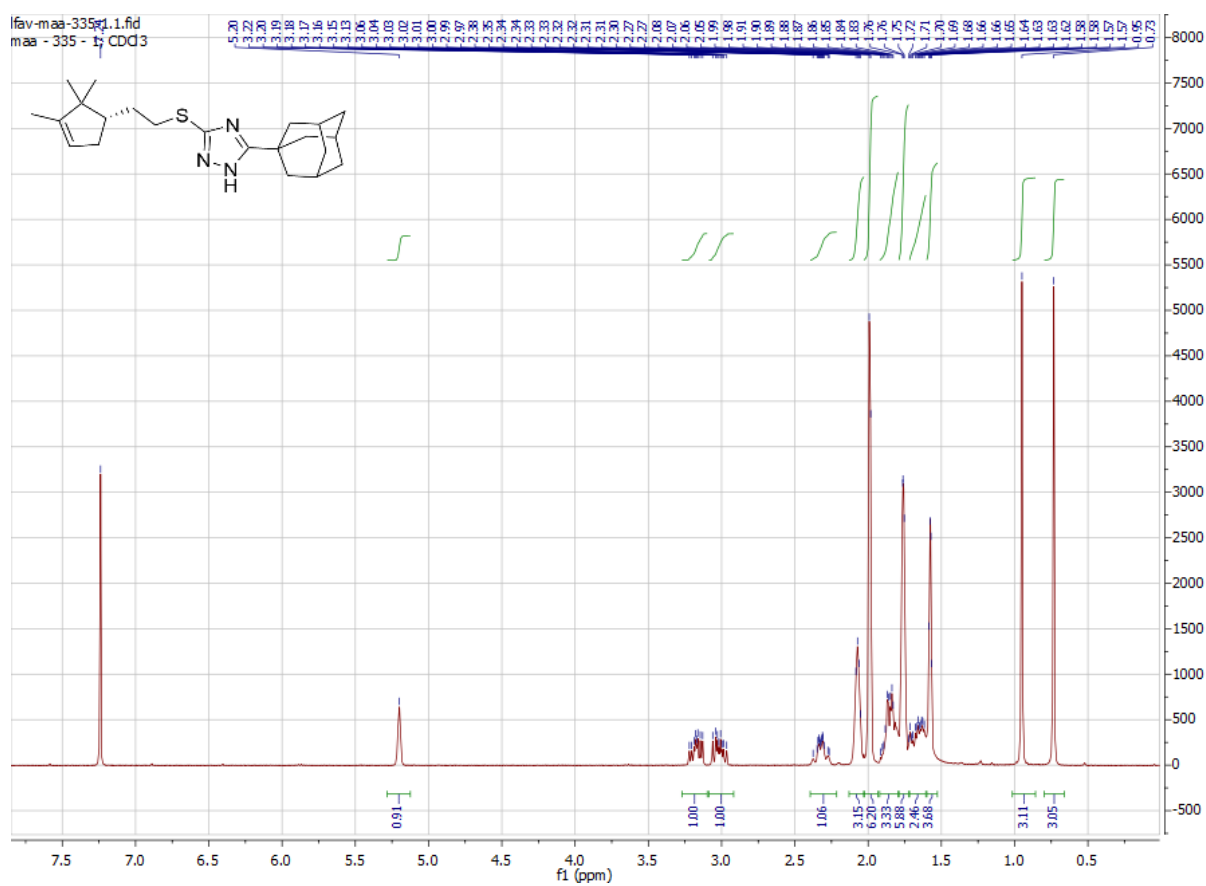

Figure S12. The <sup>1</sup>H NMR spectrum of 14b.

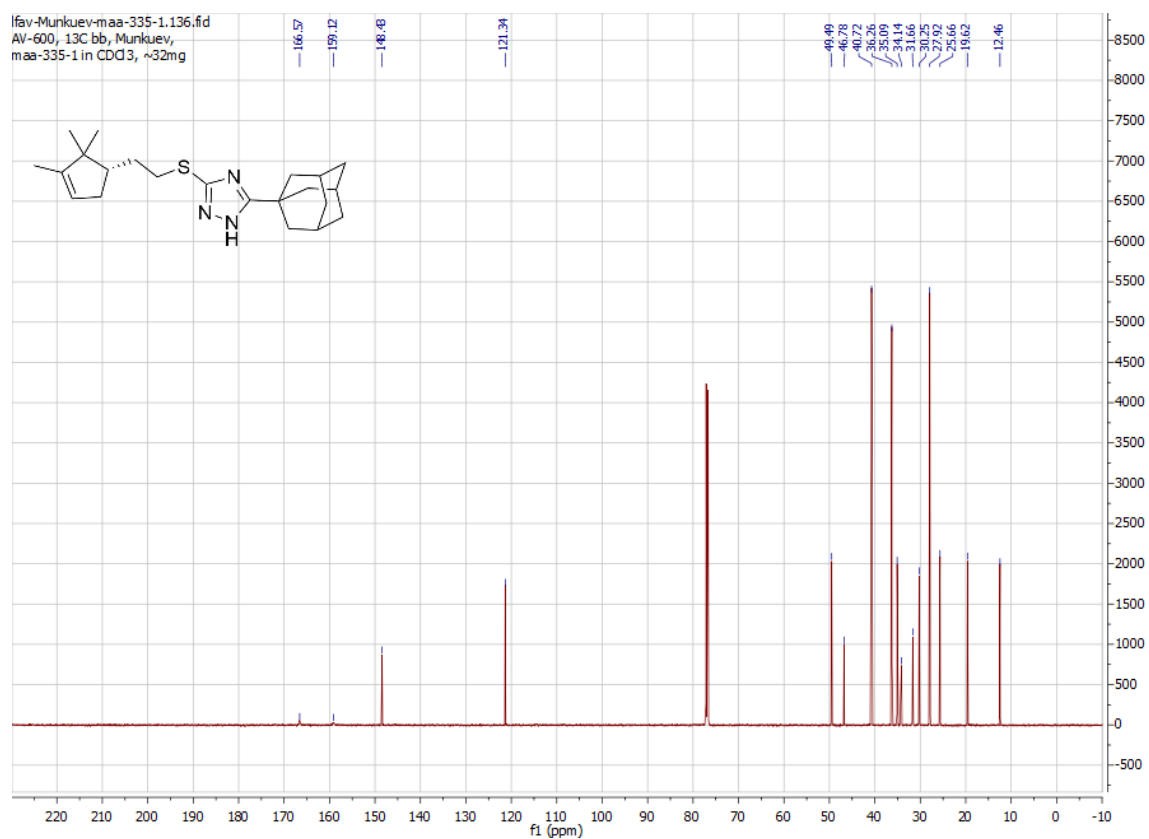

Figure S13. The <sup>13</sup>C NMR spectrum of 14b.

maa-335 #7 RT: 0.45 AV: 1 NL: 1.43E8  
T: + c EI Full ms [ 14.50-380.50]

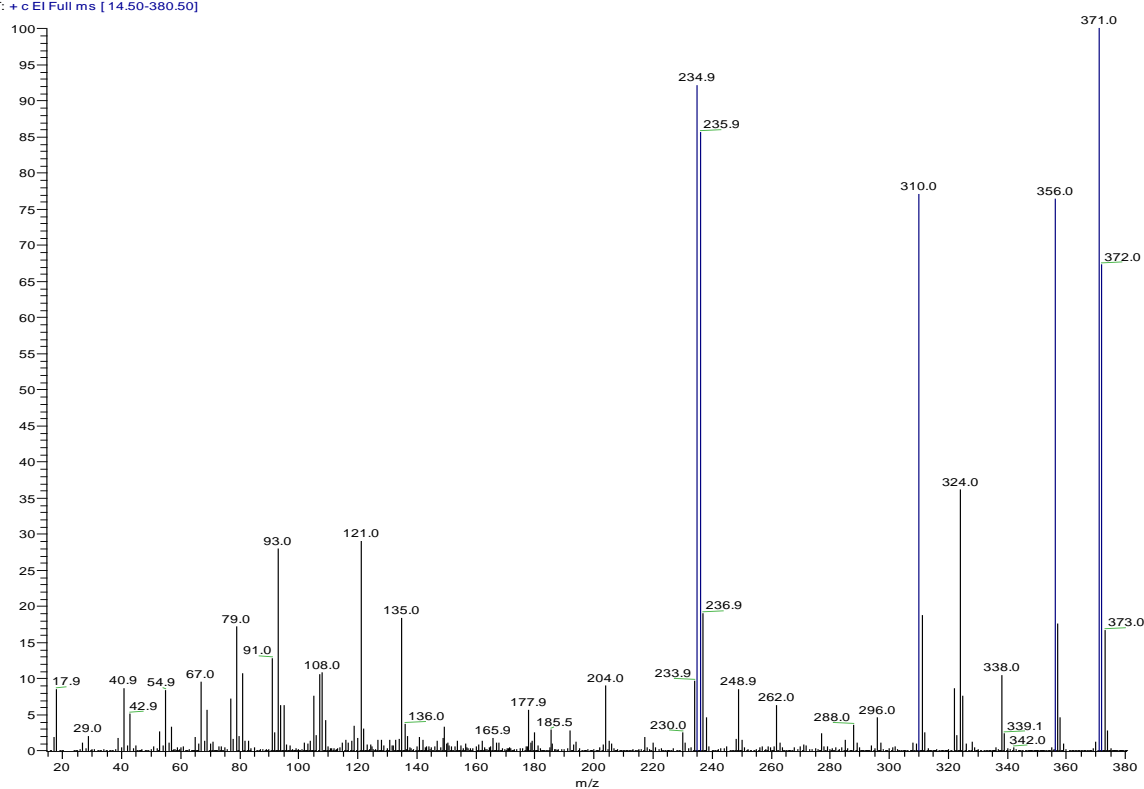

Figure S14. The DFS spectrum of 14b.

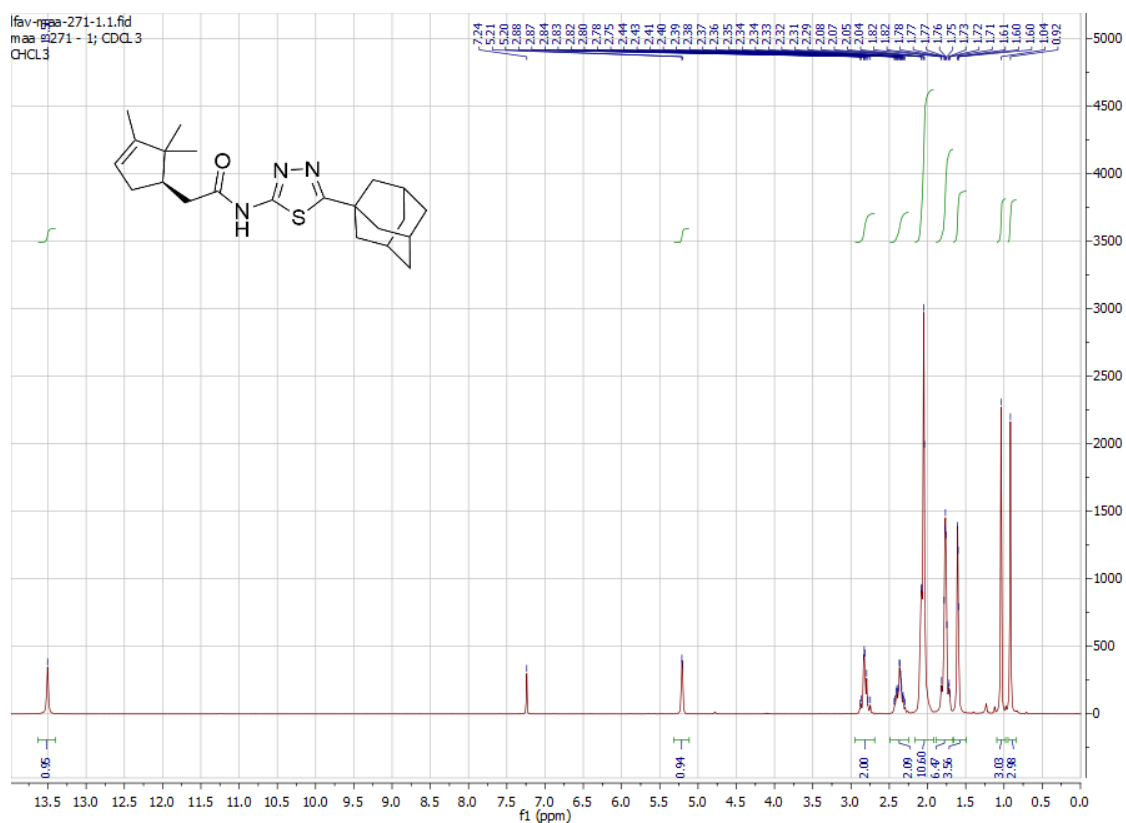

Figure S15. The <sup>1</sup>H NMR spectrum of 15a.

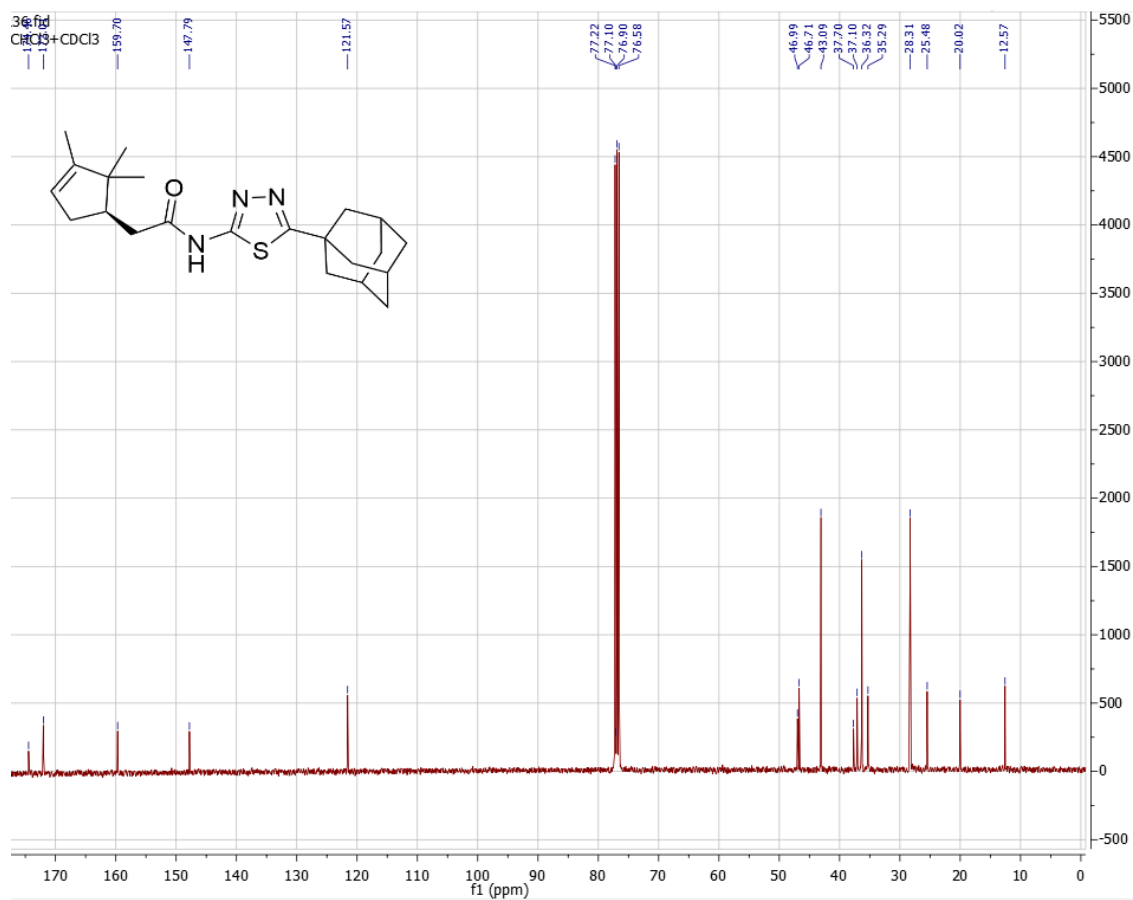

Figure S16. The <sup>13</sup>C NMR spectrum of 15a.

maa-271 #14 RT: 0.99 AV: 1 NL: 5.35E7  
T: + c EI Full ms [14.50-400.50]

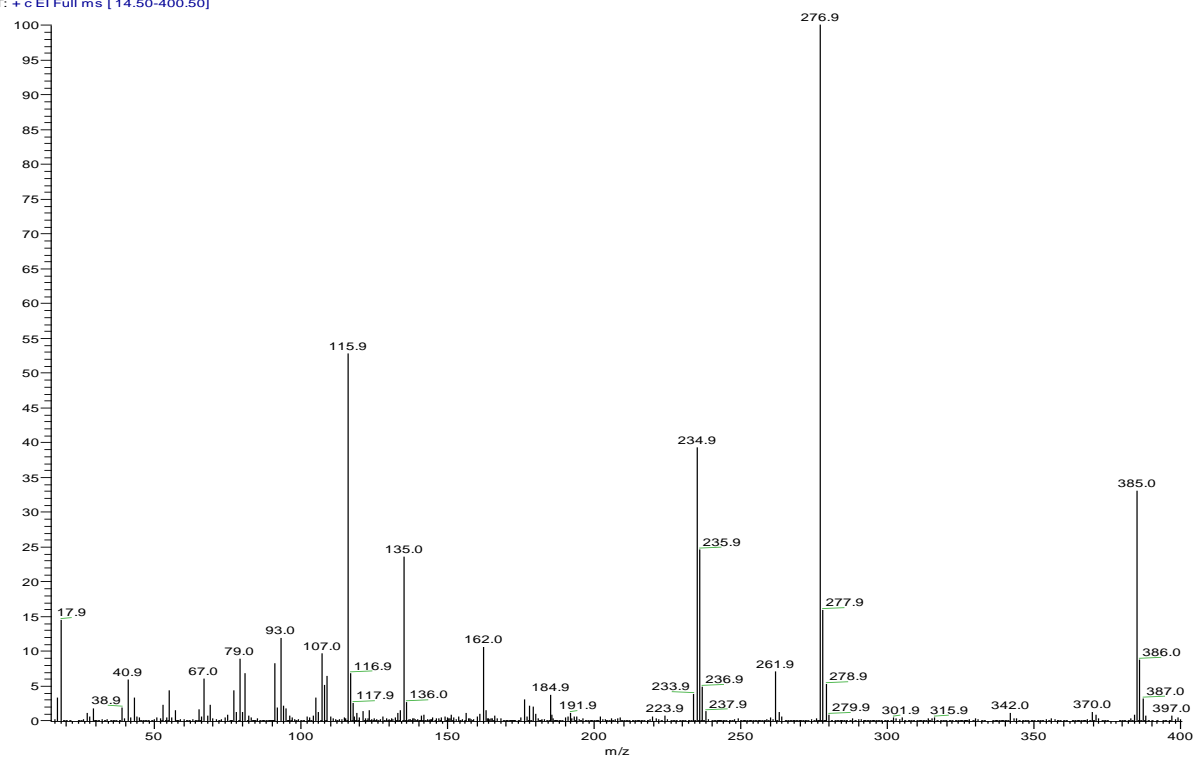

Figure S17. The DFS spectrum of 15a.

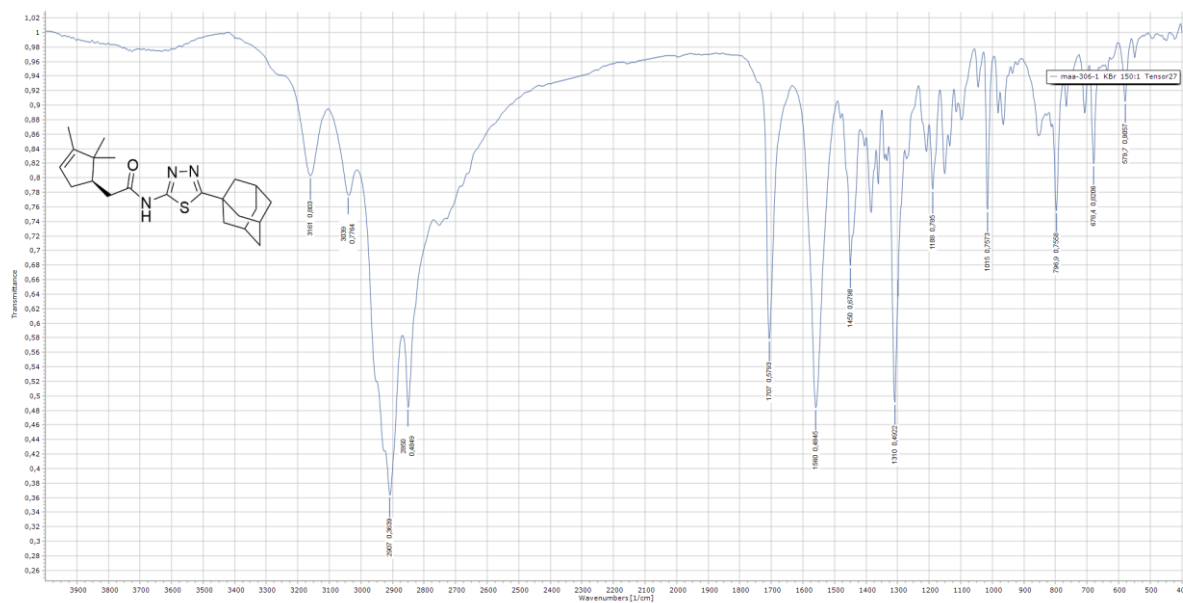

Figure S18. The IR spectrum of 15a.

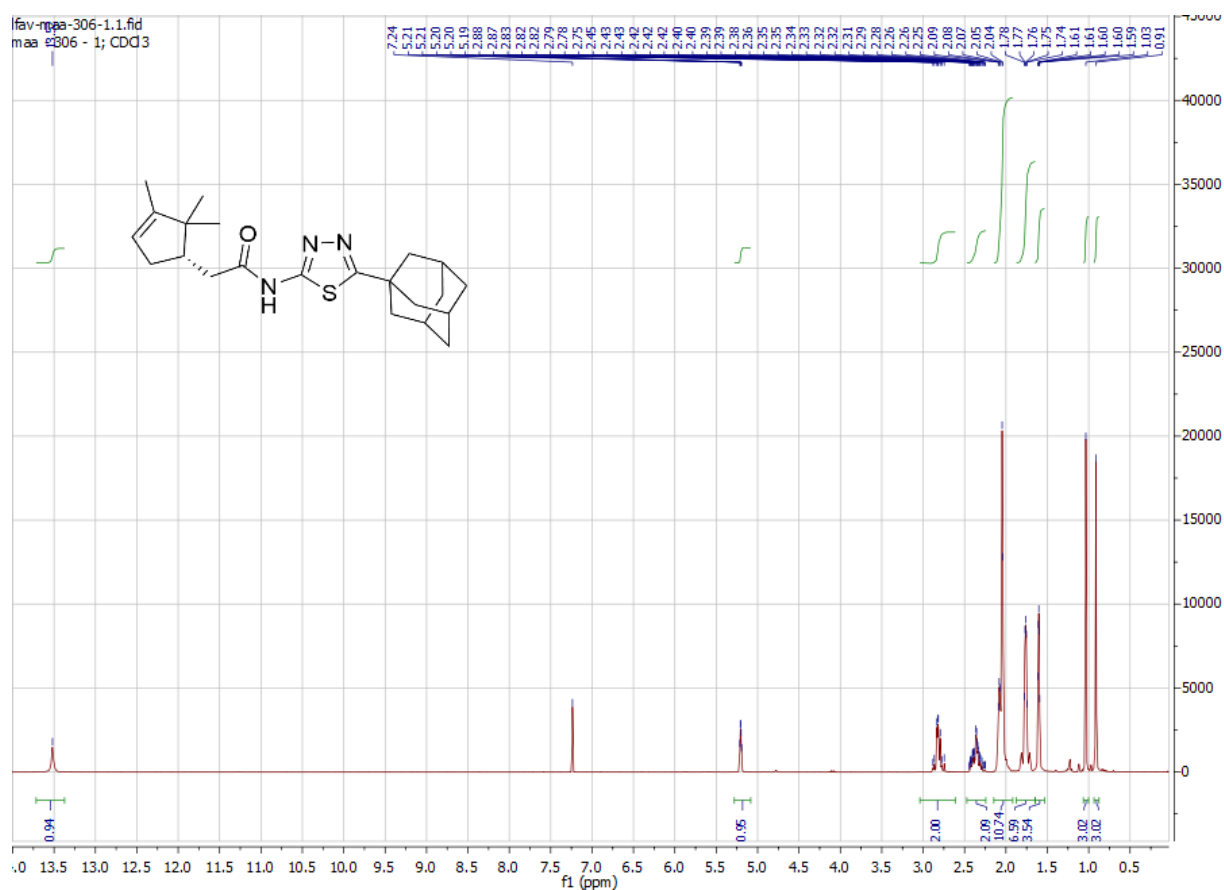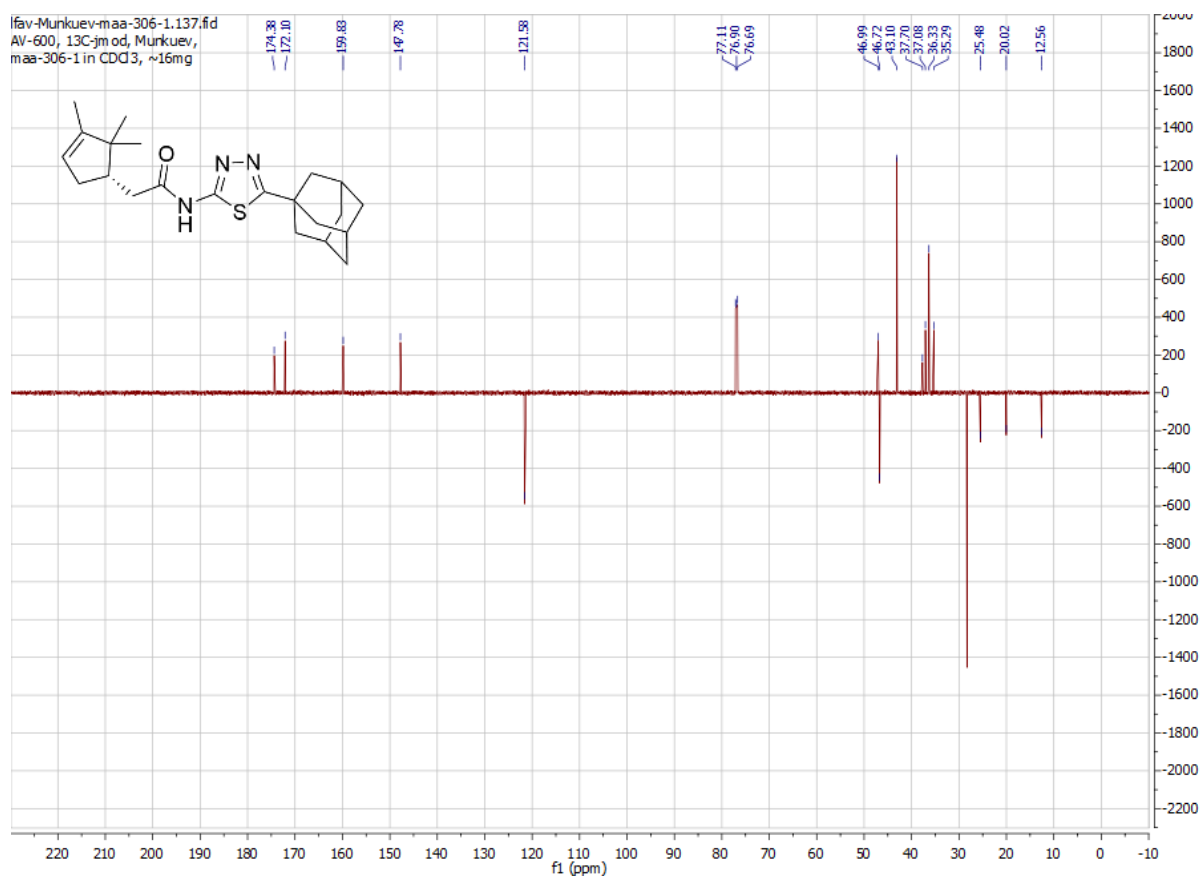

maa-306 #3 RT: 0.12 AV: 1 NL: 3.50E7  
T: + c EI Full ms [32.50-415.50]

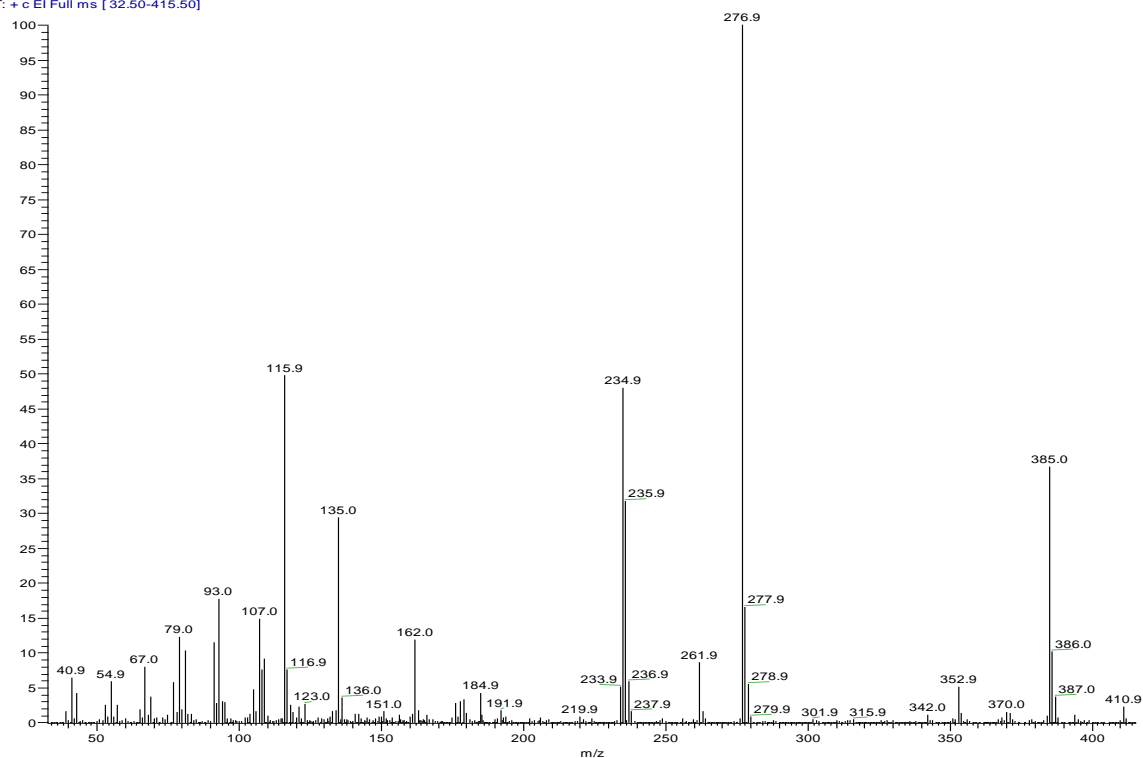

Figure S21. The DFS spectrum of 15b.

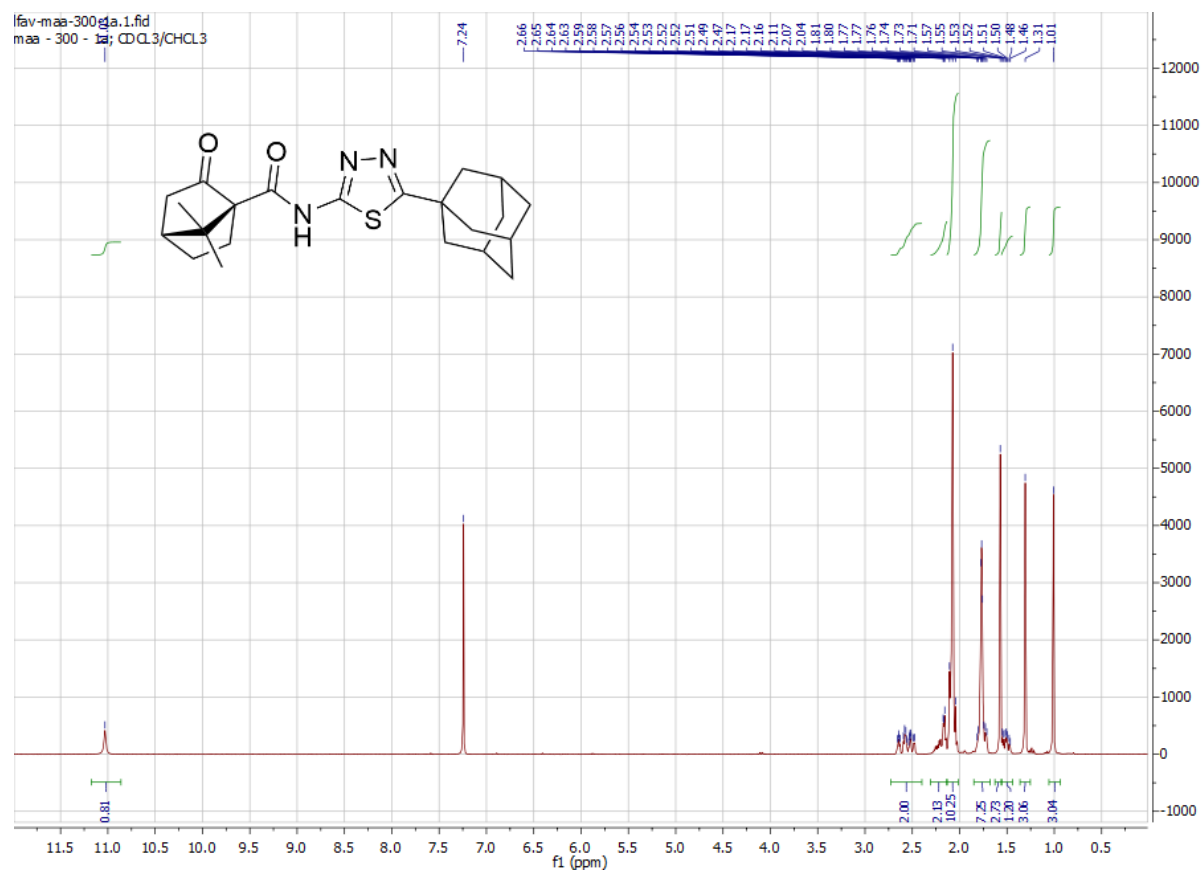

Figure S22. The <sup>1</sup>H NMR spectrum of 16.



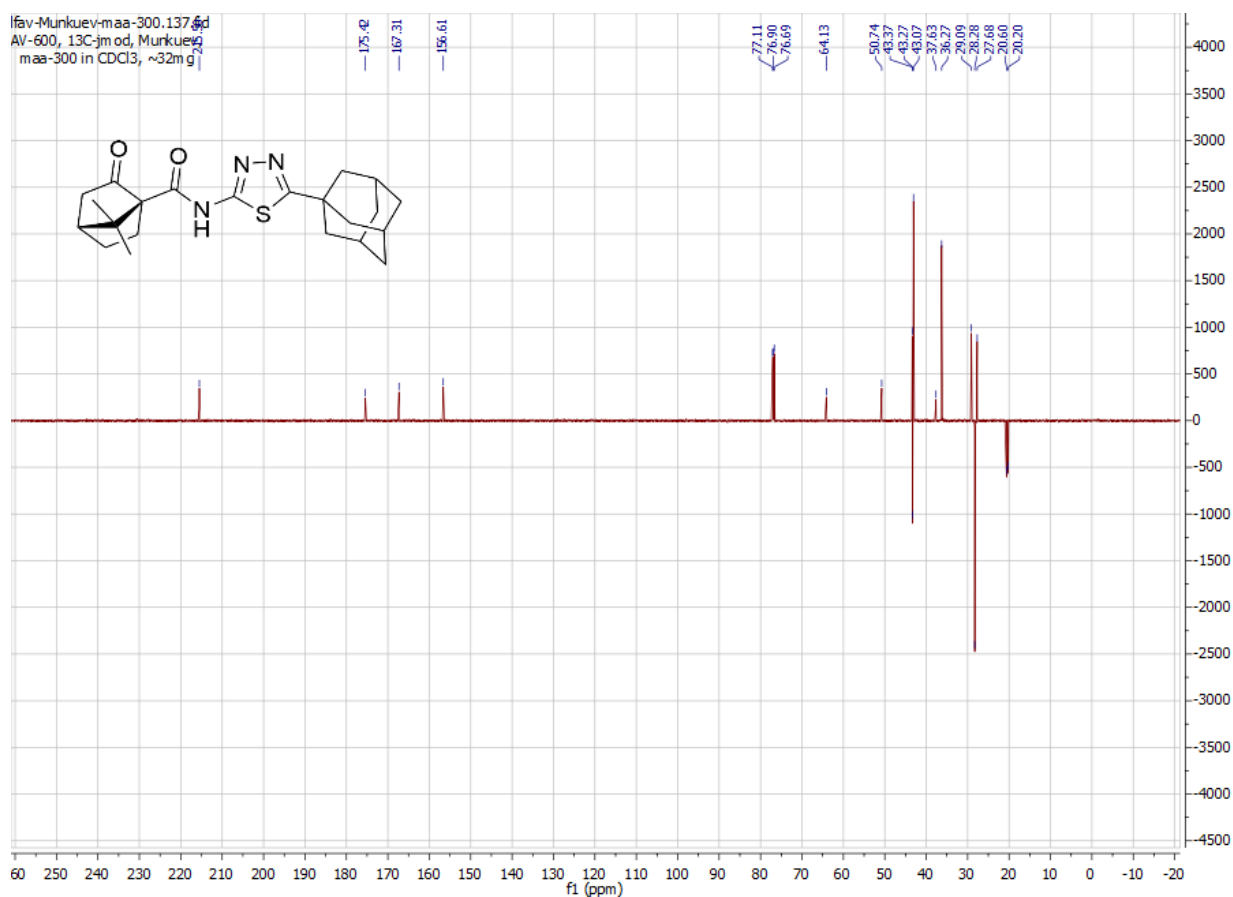

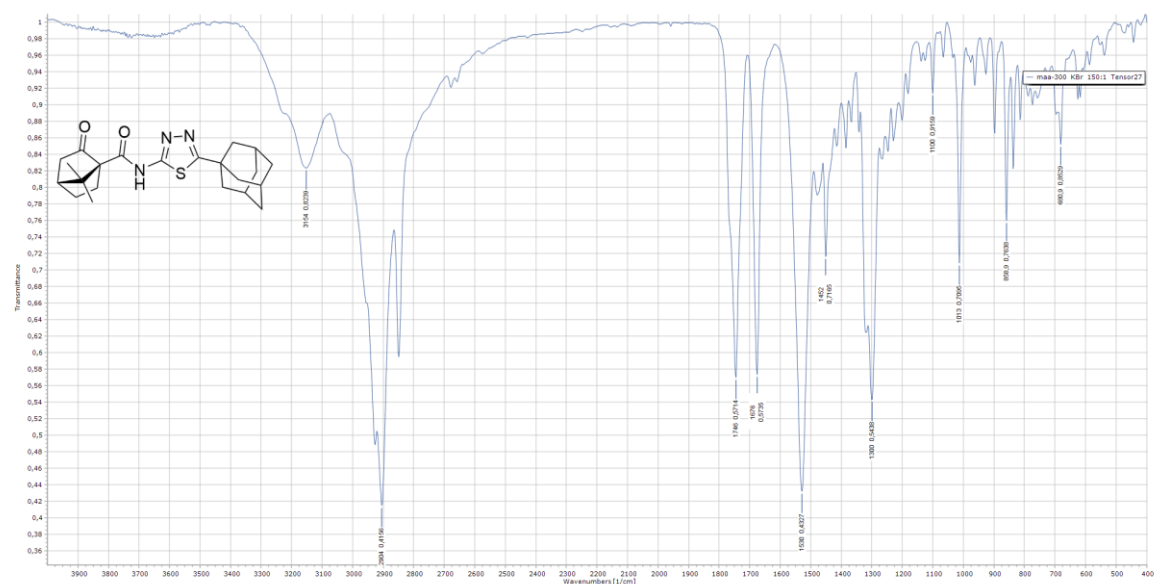

Figure S25. The IR spectrum of 16.

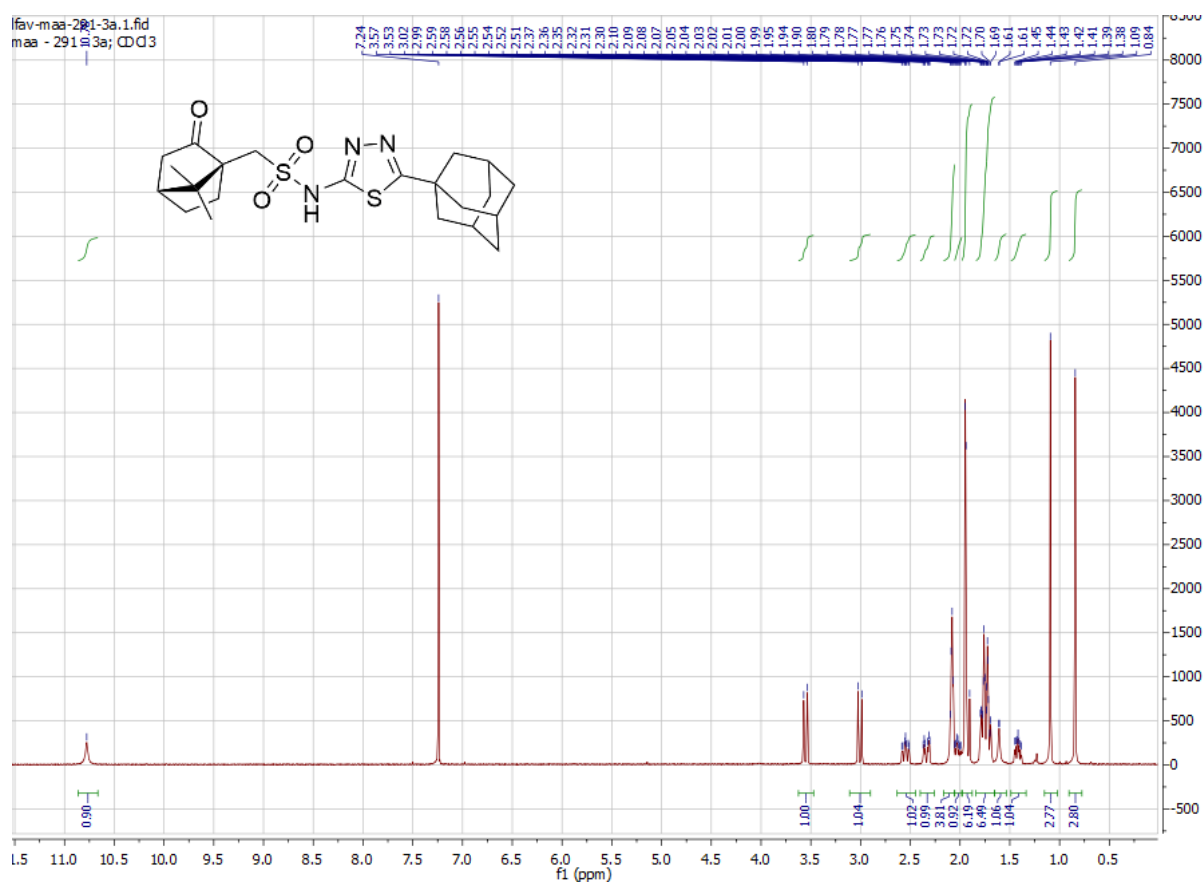

Figure S26. The <sup>1</sup>H NMR spectrum of 17.

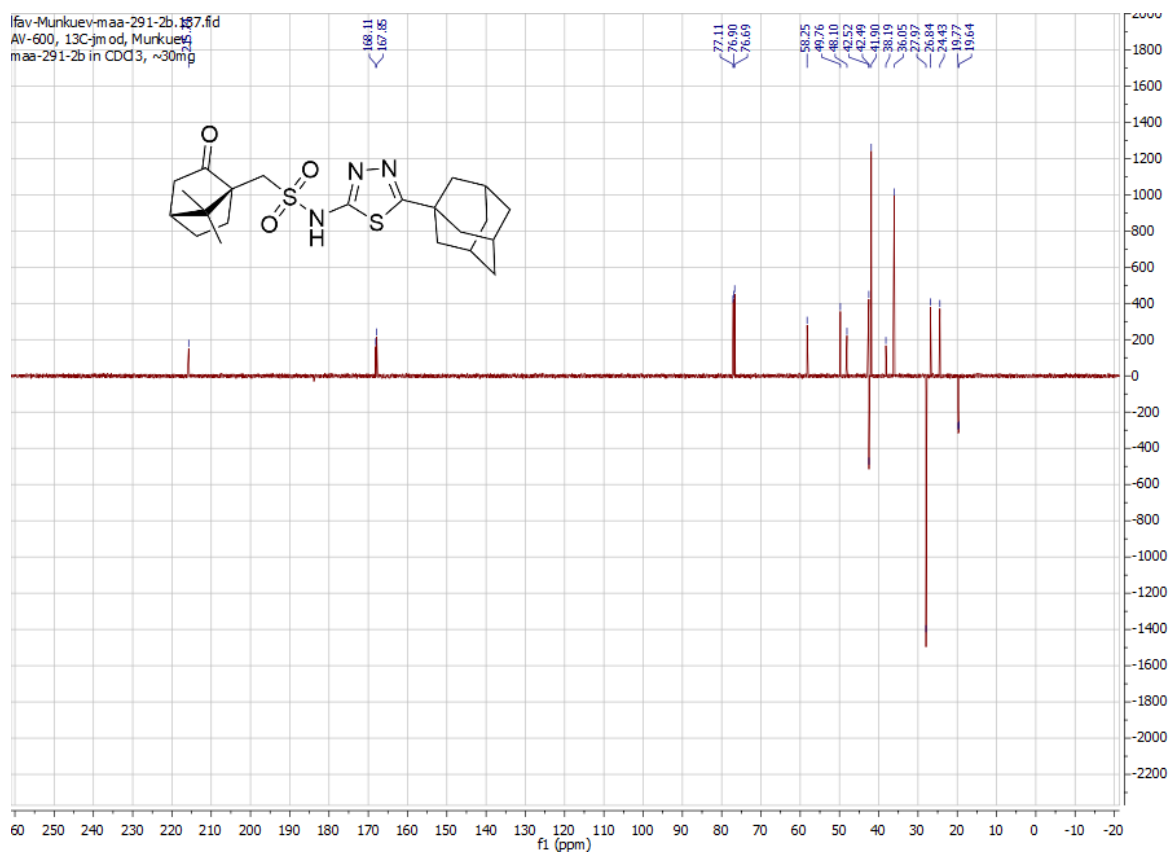

Figure S27. The <sup>13</sup>C NMR spectrum of 17.

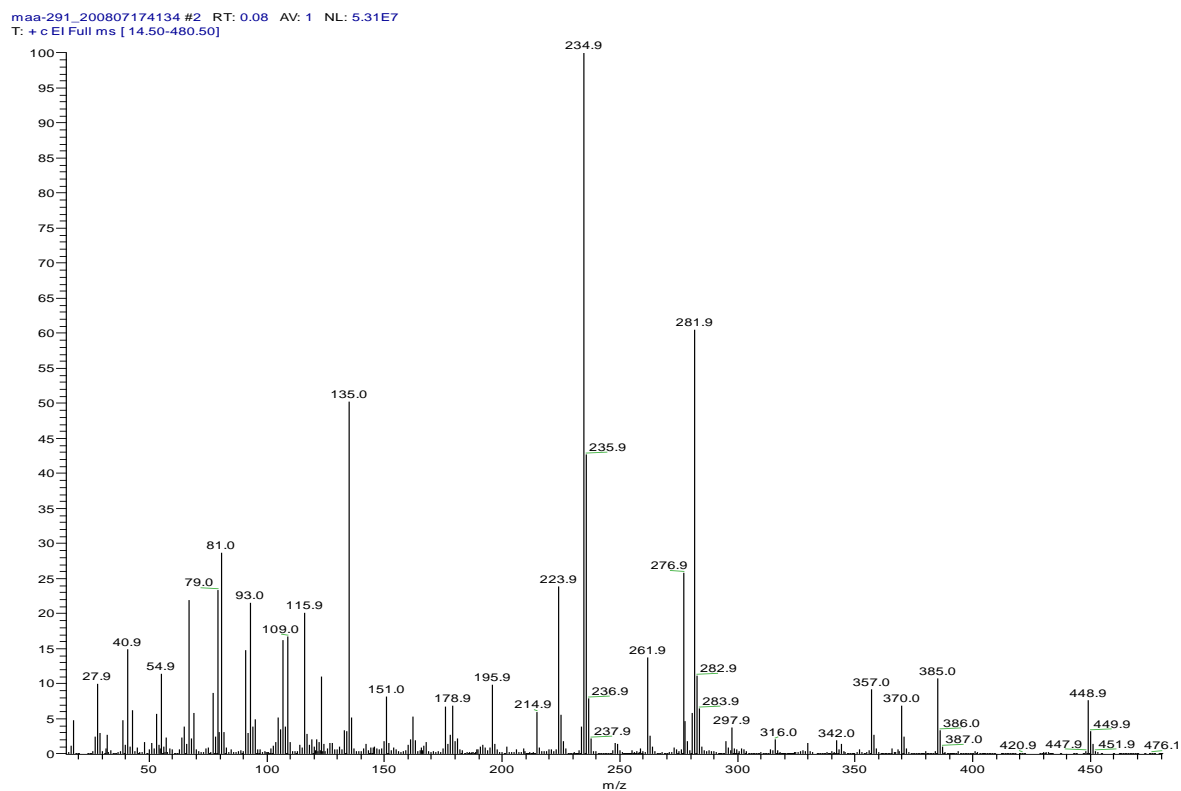

Figure S28. The DFS spectrum of 17.

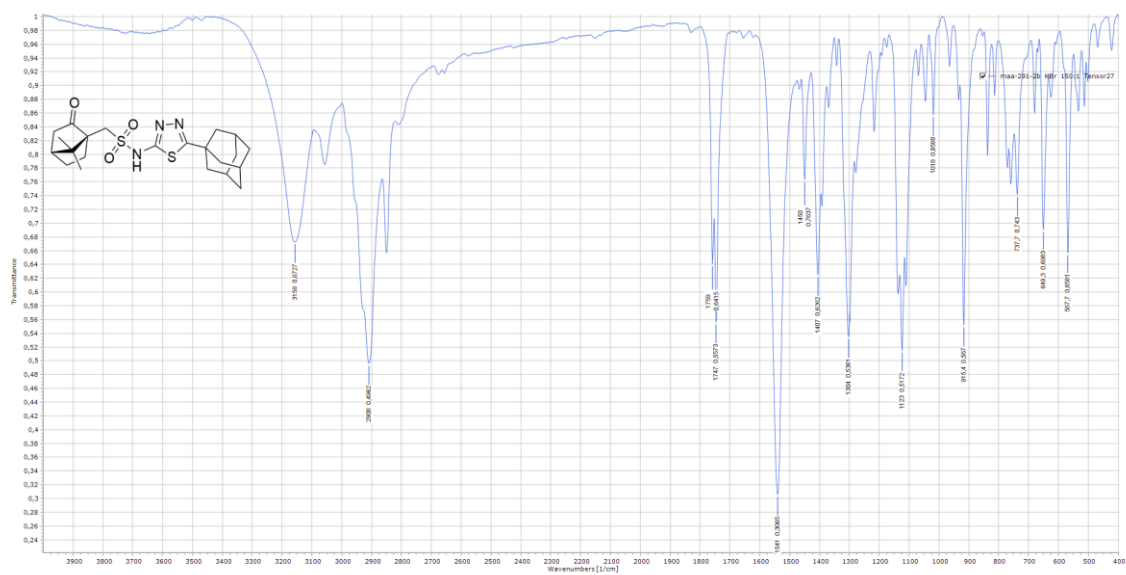

Figure S29. The IR spectrum of 17.
